# Supplementary material for: Symbiotic reactions over a high-entropy alloy catalyst enable ultrahigh-voltage Li–CO2 batteries
Source: Royal Society of Chemistry journal article supplement (doi:10.1039/d4ee04116j), 2024-12-02
Supplement: d4ee04116j1.pdf [file d4ee04116j1.pdf]

**Supplemental Information**

**Symbiotic Reactions over a High-Entropy Alloy Catalyst**

**Enable Ultrahigh-Voltage Li-CO<sub>2</sub> Batteries**

## **Experimental Procedure**

### **Synthesis of Zn-DPCN Support**

Zinc (II) nitrate hexahydrate (1.118 g; Beijing Tongguang Fine Chemical Company, AR) and 2-methylimidazole (1.232 g; Sigma-Aldrich, AR) were separately dissolved in methanol (Sigma-Aldrich, AR). After magnetic stirring for 30 min, the two solutions were combined and stirred at room temperature for 24 h. The resulting precipitate was collected by centrifugation, washed at least three times with methanol, and dried at 70 °C in a vacuum oven for 10 h to obtain the precursor, which was denoted as ZIF-8. Subsequently, ZIF-8 was heated at 900 °C in a tube furnace under Ar/H<sub>2</sub> (Hydrogen is 5wt%) flow for 3 h to obtain Zn-DPCN. This product was treated with 0.5 M H<sub>2</sub>SO<sub>4</sub> for 1 h to remove unstable Zn. The sample was then washed until the pH was neutral, recovered by centrifugation, and dried to obtain the pretreated Zn-DPCN support.

### **Synthesis of PRZCNC-HEA Catalyst**

First, 0.005 mmol of various nonprecious metals (Co(acac)<sub>2</sub> (Sigma-Aldrich, AR), Ni(acac)<sub>2</sub> (Sigma-Aldrich, AR), and Cu(acac)<sub>2</sub> (Sigma-Aldrich, AR)), and Ru(acac)<sub>3</sub> (Sigma-Aldrich, AR) and H<sub>2</sub>PtCl<sub>6</sub>·6H<sub>2</sub>O (0.6 mL of a 10 mM solution; Sigma-Aldrich, AR) were dissolved in 20 mL of a water and alcohol mixture. Next, the Zn-DPCN support (25 mg) was dispersed in this solution, which was then ultrasonicated for 30 min. To evaporate the solvent, the suspension was heated at 70 °C with magnetic stirring. The thick slurry was transferred to an oven and dried overnight. After grinding in an agate mortar, the powder was annealed and alloyed at 800 °C for 4 h under flowing Ar/H<sub>2</sub> (Hydrogen is 5wt%). After treatment with 0.1 M HClO<sub>4</sub> for 30 min, the mixture was centrifuged and dried overnight. Reference samples with different atomic ratios were synthesized using the same procedure.

### **Characterization**

XRD patterns were recorded on a Bruker D8 Focus diffractometer at a scan rate of 1°

min<sup>-1</sup> with Cu K $\alpha$  radiation. TEM images were collected using a JEOL 2010F microscope operated at 200 kV. High-resolution STEM images, STEM-EDX mapping, and line scans were obtained using a Cs-corrected FEI Titan Themis Z microscope operated at 300 kV with a convergence semi-angle of 25 mrad and equipped a probe SCOR spherical aberration corrector. ICP-AES was performed using a Prodigy 7 ICP-AES instrument. The sample was pressed into a block for XRF analysis. XPS was performed using a VG ESCALAB MKII instrument with a Mg K $\alpha$  X-ray source. The Ru, Co, Ni, Cu, and Zn K-edge spectra and Pt L<sub>3</sub>-edge spectra were collected in fluorescence mode at beamline 1W2B with a Si (111) double-crystal monochromator at the Beijing Synchrotron Radiation Facility (BSRF). The ATHENA software package was used to analyze the XANES and EXAFS data.

### **Electrochemical Measurements**

The catalyst was combined with PVDF as a binder at a weight ratio of 9:1 in *N*-methyl-2-pyrrolidone as a solvent to obtain a uniform slurry. This slurry was then applied to carbon cloth and dried under vacuum at 100 °C for 10 h. The resulting electrode had a mass loading of 1.0–2 mg cm<sup>-2</sup>. Prototype Li–CO<sub>2</sub> batteries were assembled using CR2032-type coin cells with seven holes ( $\Phi = 2$  mm) in the cover for CO<sub>2</sub> diffusion. The electrolyte consisted of 1 M lithium bis(trifluoromethanesulfonyl)imide (LiTFSI) in tetraethylene glycol dimethyl ether (TEGDME). Lithium metal foil served as the anode and a Whatman A glass fiber separator was used to isolate the anode and cathode. The battery was assembled in a glovebox filled with high-purity argon, and electrochemical testing was carried out in a custom-made container.

### **Computational Details**

All DFT calculations were implemented in the Vienna ab initio simulation package (VASP) using the projector-augmented wave (PAW) approach.<sup>1,2</sup> The HEA bulk structure was modeled using a special quasirandom structure (SQS) method with the sqsgenerator code.<sup>3</sup> Surface cleavage and site search modeling were performed within

the code based on pymatgen.<sup>4</sup> When constructing the slab models, a vacuum space of 15 Å was adopted to reduce the influence of adjacent images. Structural relaxation was performed via spin-polarized calculations and the generalized gradient approximation with the Perdew–Burke–Ernzerhof (PBE) functional. The energy cut-off of the plane waves was set to 500 eV. For all the calculations with slab models, a K-spacing value of 0.04 was used to generate K-Mesh.<sup>5</sup> bulk, surface, and adsorption model structures were fully relaxed using energy and force convergences of  $1 \times 10^{-5}$  eV and  $0.02 \text{ eV \AA}^{-1}$ , respectively. The dispersion-corrected DFT-D3 method was used to describe the van der Waals (vdW) interactions.<sup>5</sup>

### **In Situ FTIR Investigation**

A single-crystal silicon wafer with a gold coating was used as a substrate to enhance surface signals during in situ FTIR measurements. An in situ infrared test cell (HighSurrey) with a single-crystal Si window was used for all measurements. The electrochemical cell utilized springs to vary the load, ensuring close contact between the positive and negative electrodes and the separator. The optical table was equipped with an optical stage that had a continuously adjustable angle of incidence ( $30^\circ$ – $80^\circ$ ). After calibration, the angle was fixed at  $60^\circ$  with a surface penetration depth of 0.4–46  $\mu\text{m}$ . The scanning range was  $600$ – $4000 \text{ cm}^{-1}$ . During charge–discharge, signals were acquired every  $60 \text{ mAh g}^{-1}$ .

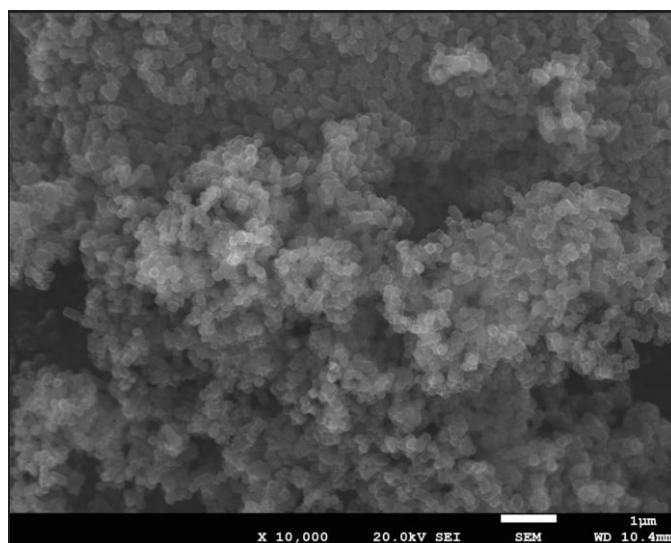

**Figure S1.** SEM image of Zn-DPCN.

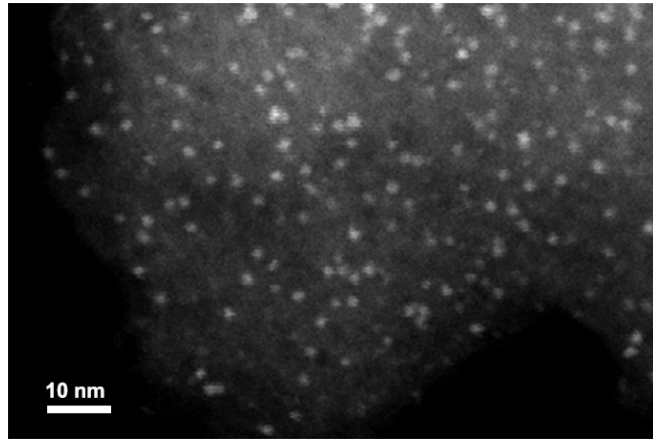

**Figure S2.** TEM image of PRZCNC-HEA.

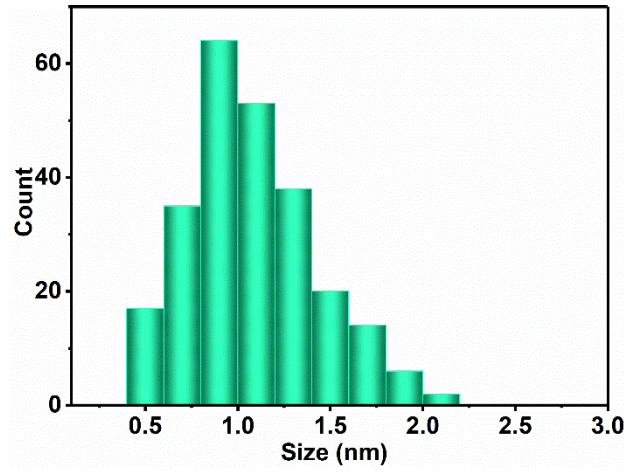

**Figure S3.** Particle size distribution histogram of PRZCNC-HEA.

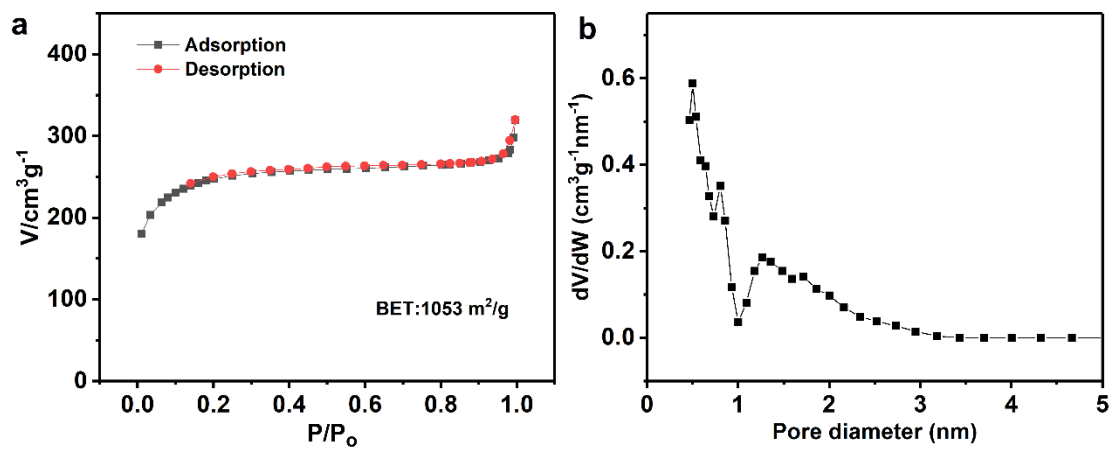

**Figure S4.** (a) N<sub>2</sub> adsorption–desorption isotherm and (b) pore size distribution of PRZCNC-HEA.



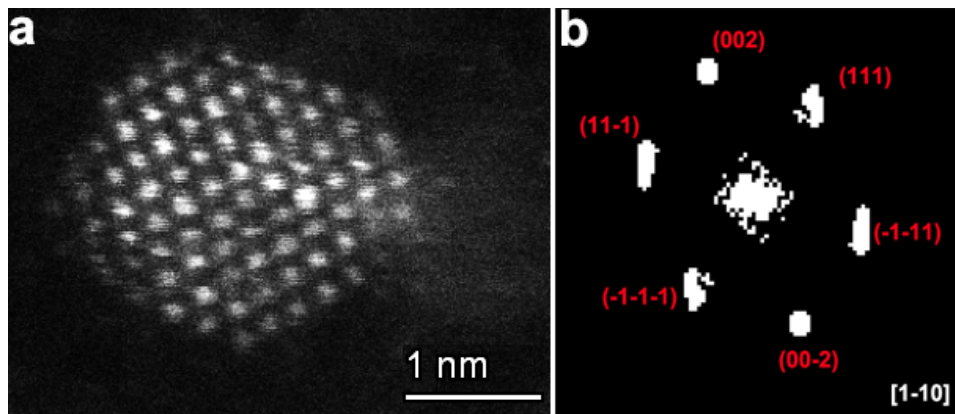

**Figure S5.** (a) HAADF-STEM image of PRZCNC-HEA and (b) corresponding Fourier transform electron diffraction pattern.

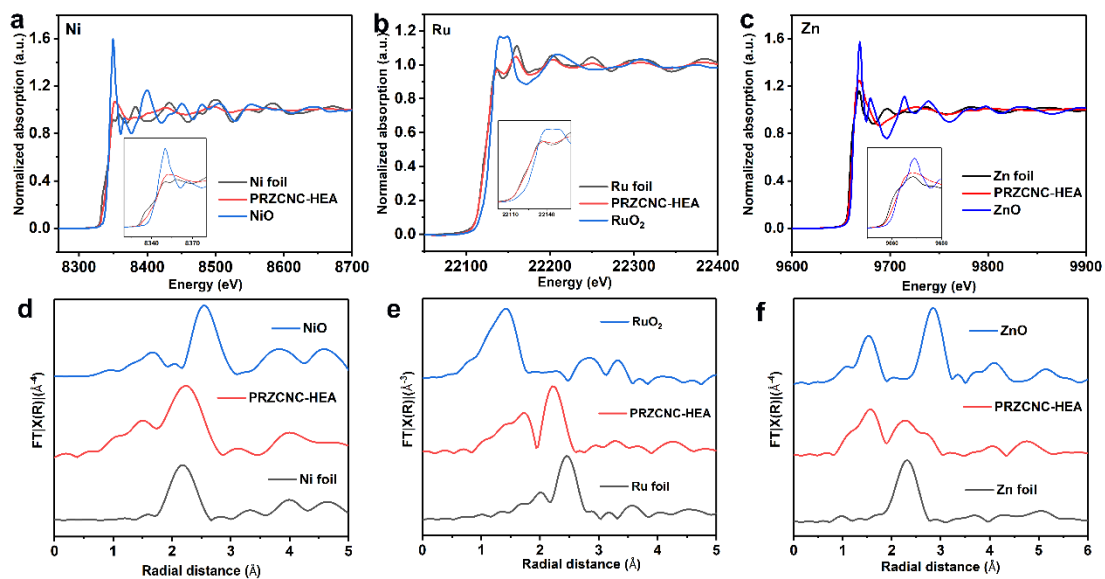

**Figure S6.** XANES spectra of (a) Ni, (b) Ru, and (c) Zn at the K-edge and EXAFS spectra of (d) Ni, (e) Ru, and (f) Zn for PRZCNC-HEA and corresponding reference samples.

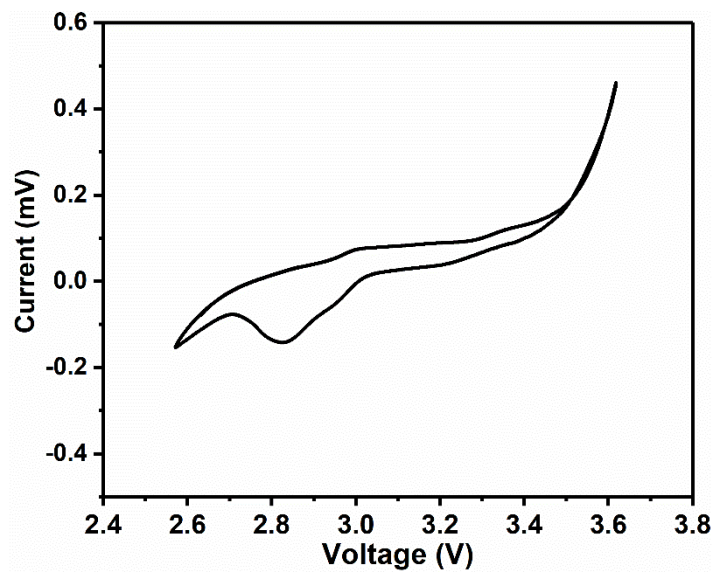

**Figure S7.** CV curve of Li-CO<sub>2</sub> battery with PRZCNC-HEA catalyst.

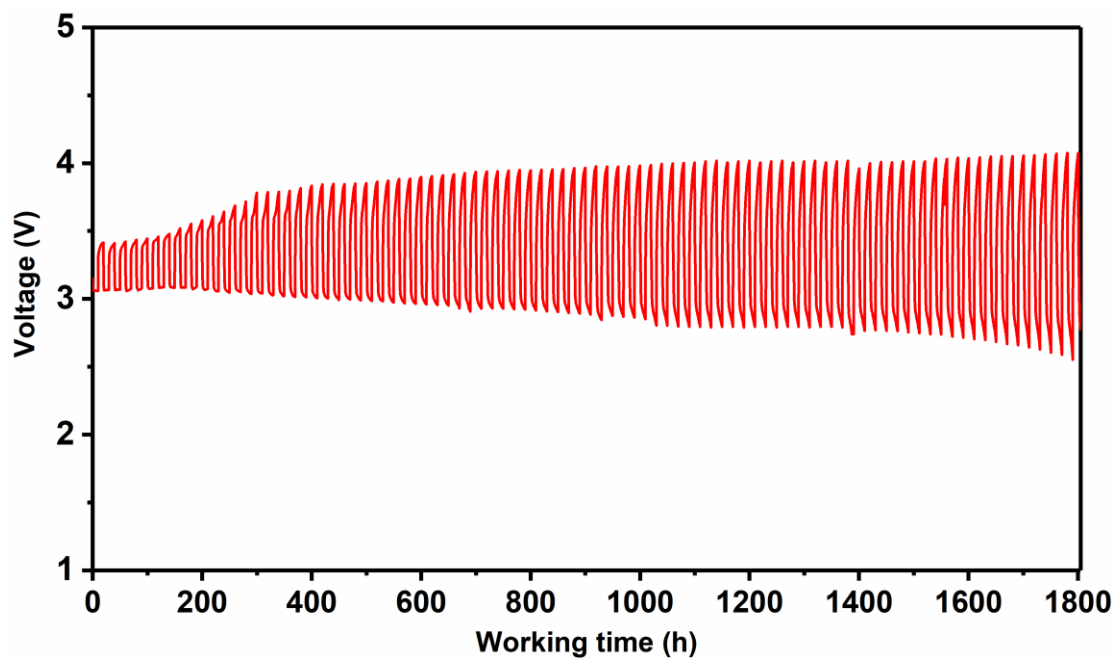

**Figure S8.** Time–voltage curve of PRZCNC-HEA at a current density of  $100 \text{ mA g}^{-1}$ .

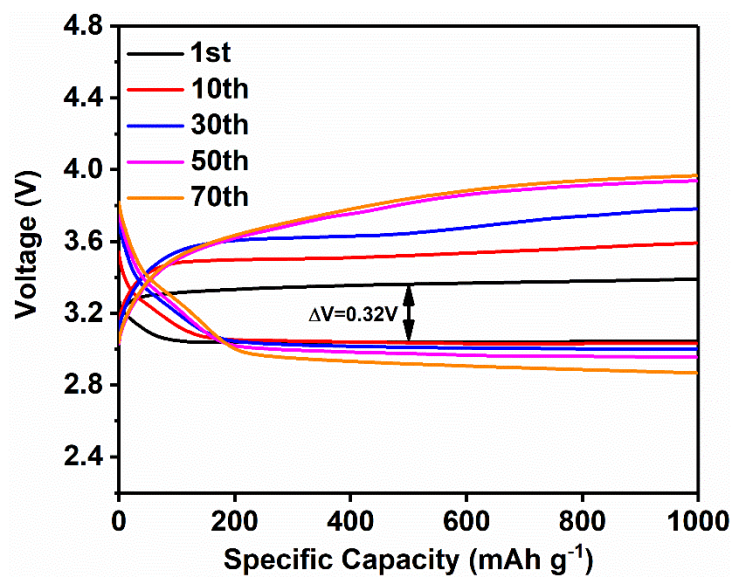

**Figure S9.** Charge–discharge curves of PRZCNC-HEA during various cycles at a current density of 100 mA g<sup>-1</sup>.

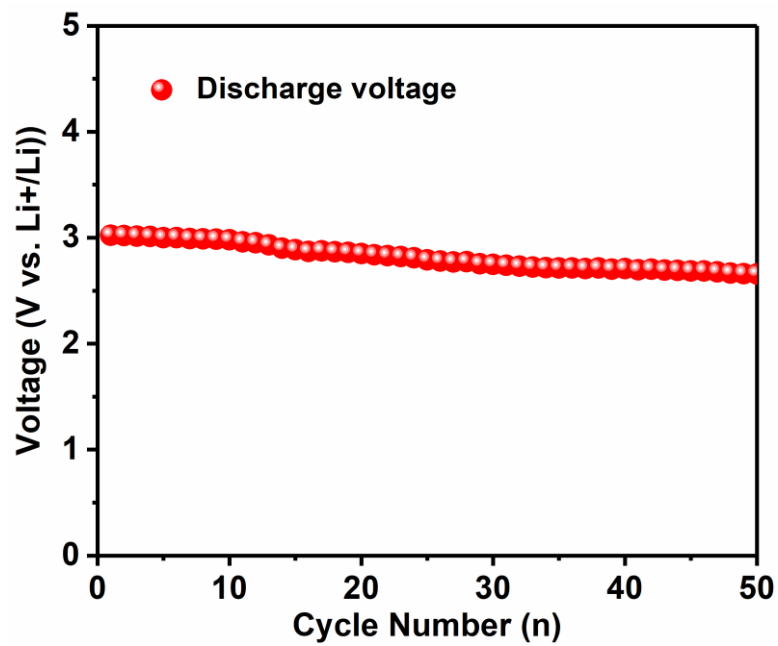

**Figure S10.** Cycling performance of PRZCNC-HEA at a cutoff capacity of 1000 mAh g<sup>-1</sup> and current density of 200 mA g<sup>-1</sup>.

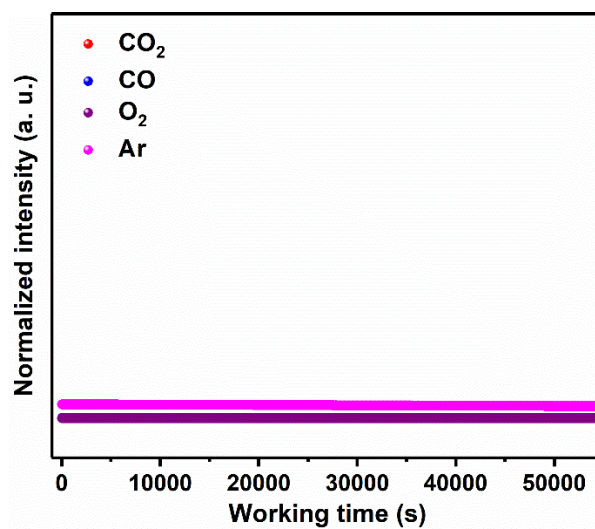

**Figure S11.** In situ DEMS results for the Li-CO<sub>2</sub> battery during the charging voltage interval, corresponding to the data shown in Figure 4e. The cathode of this battery consisted solely of carbon cloth without the PRZCNC-HEA catalyst, whereas the other components remained unchanged. The electrolyte was 1 M LiTFSI/TEGDME.

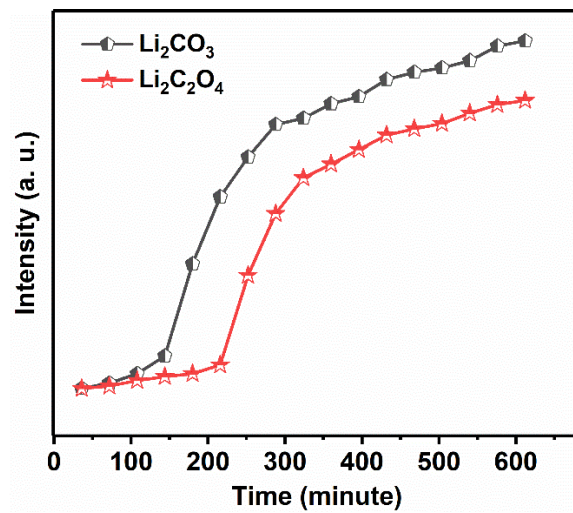

**Figure S12.** Temporal evolution of  $\text{Li}_2\text{C}_2\text{O}_4$  and  $\text{Li}_2\text{CO}_3$  peak intensities during in situ FTIR spectroscopy measurements.



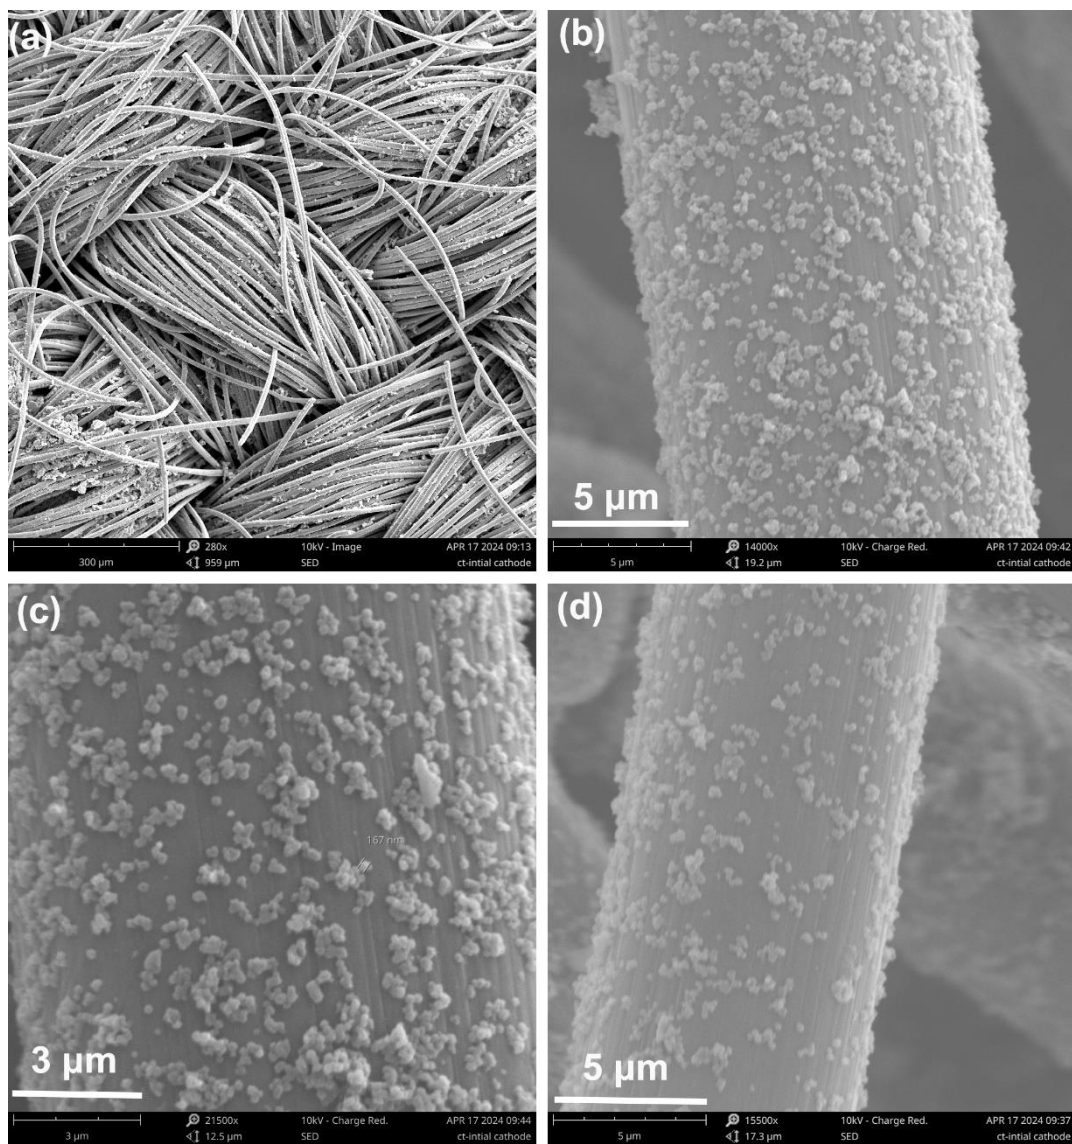

**Figure S13.** SEM images of pristine cathode.

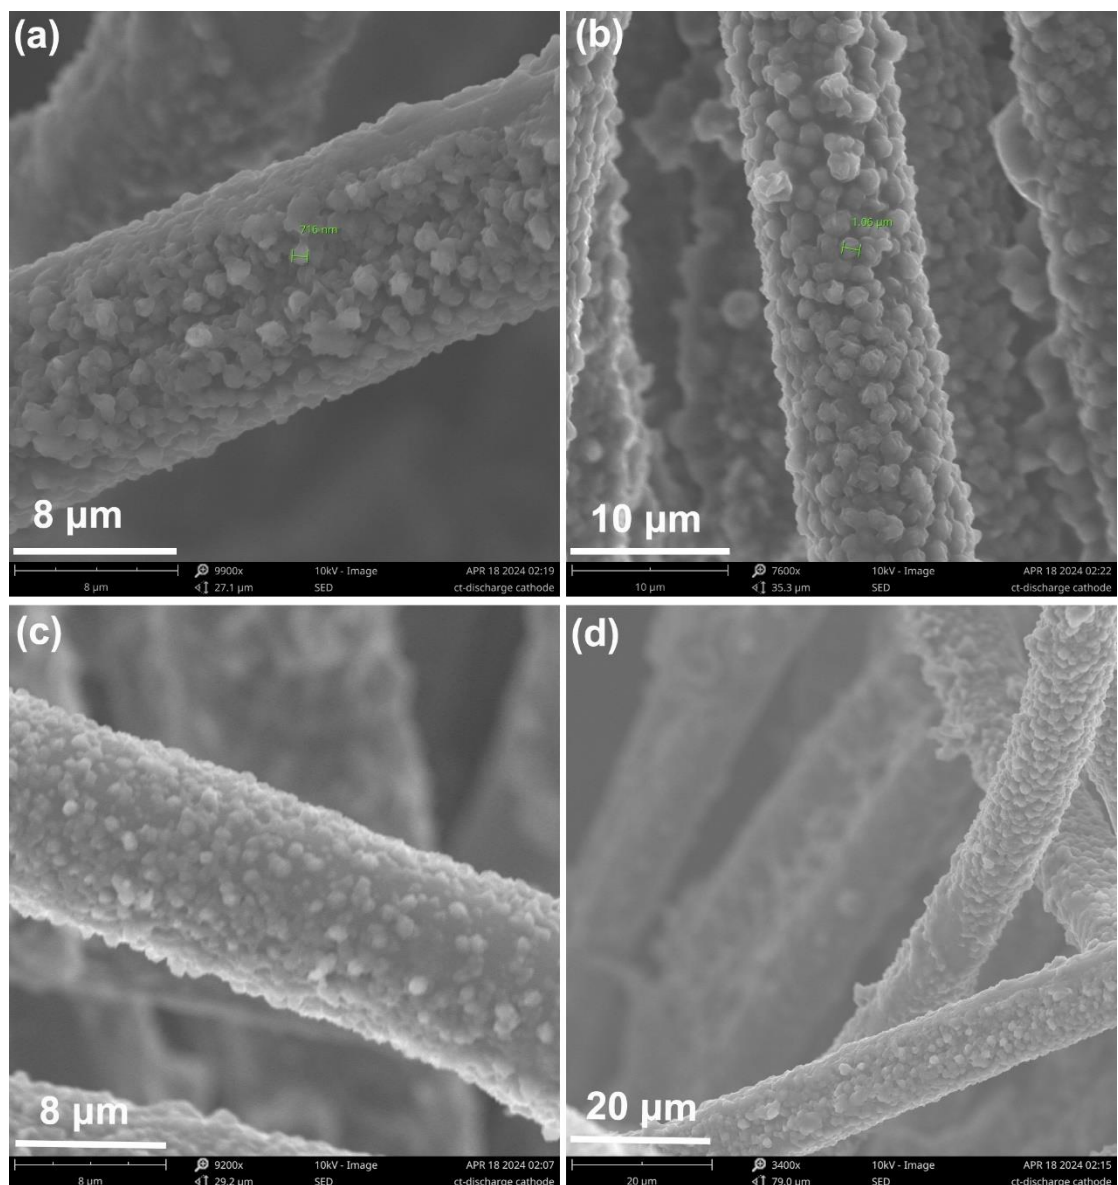

**Figure S14.** SEM images of cathode after discharge to 1000 mAh g<sup>-1</sup>.

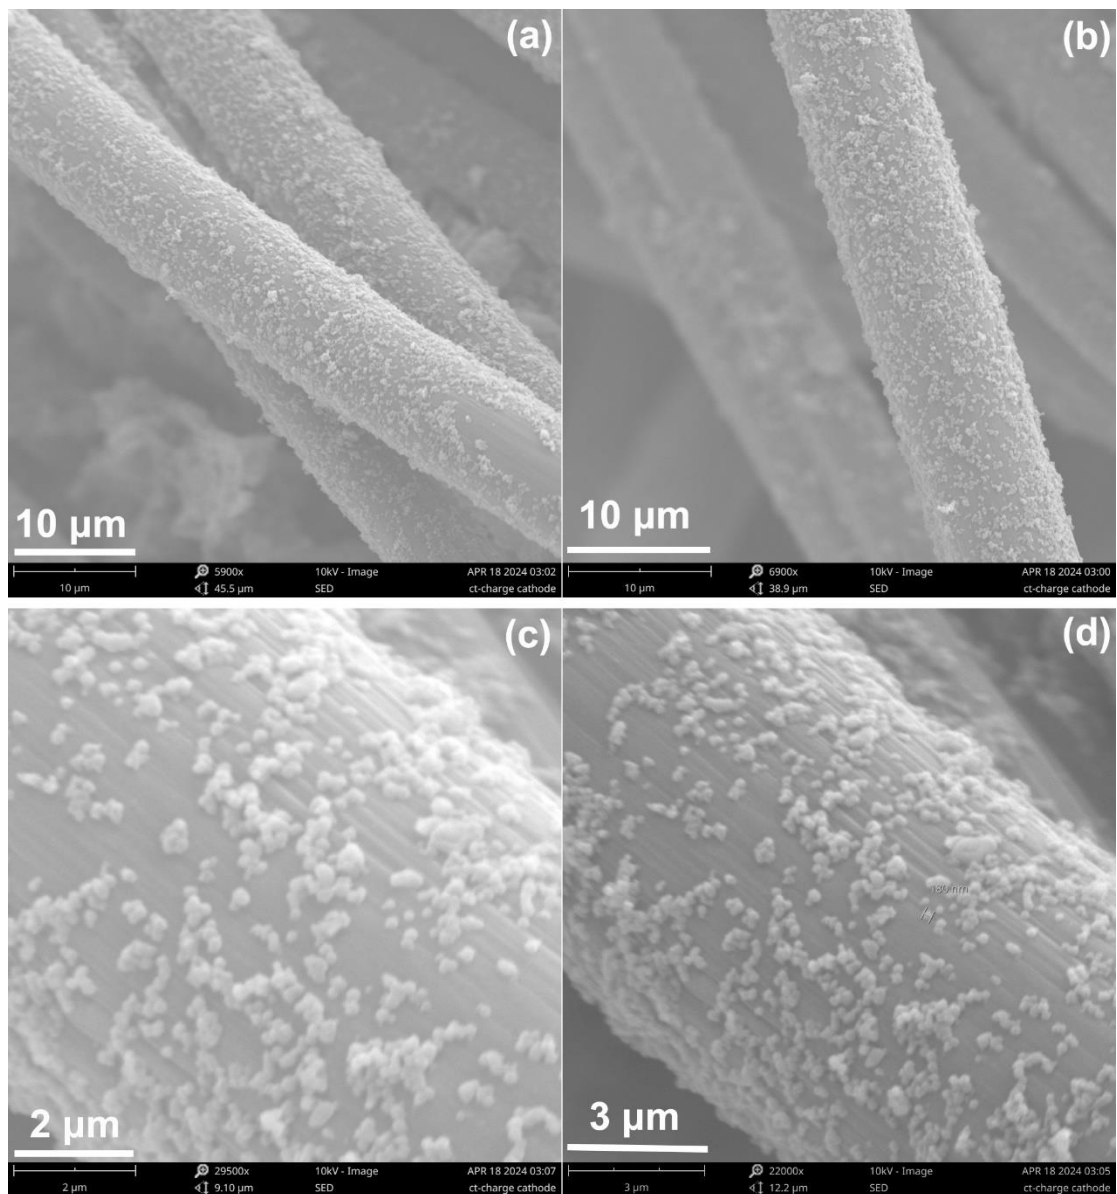

**Figure S15.** SEM images of cathode after charge to 1000 mAh g<sup>-1</sup>.

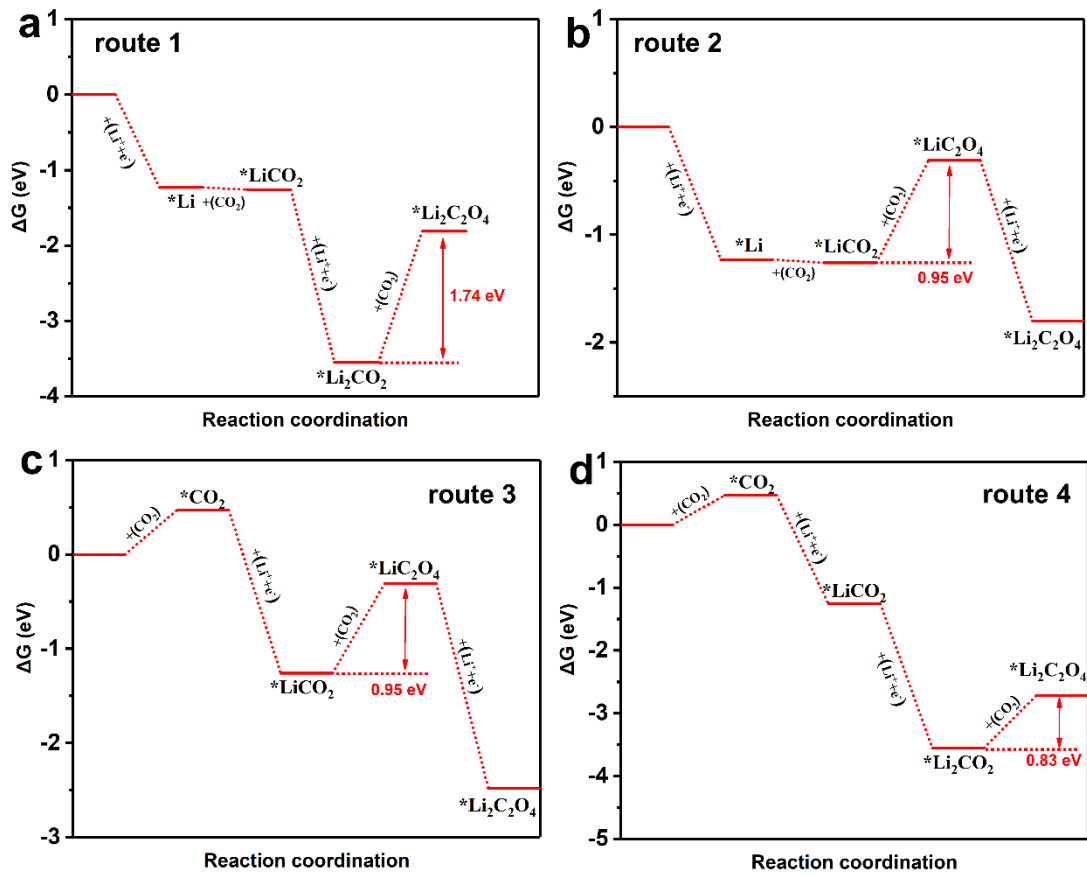

**Figure S16.** (a–d) Free energies of intermediates during CO<sub>2</sub> reduction to generate Li<sub>2</sub>C<sub>2</sub>O<sub>4</sub> via various pathways.

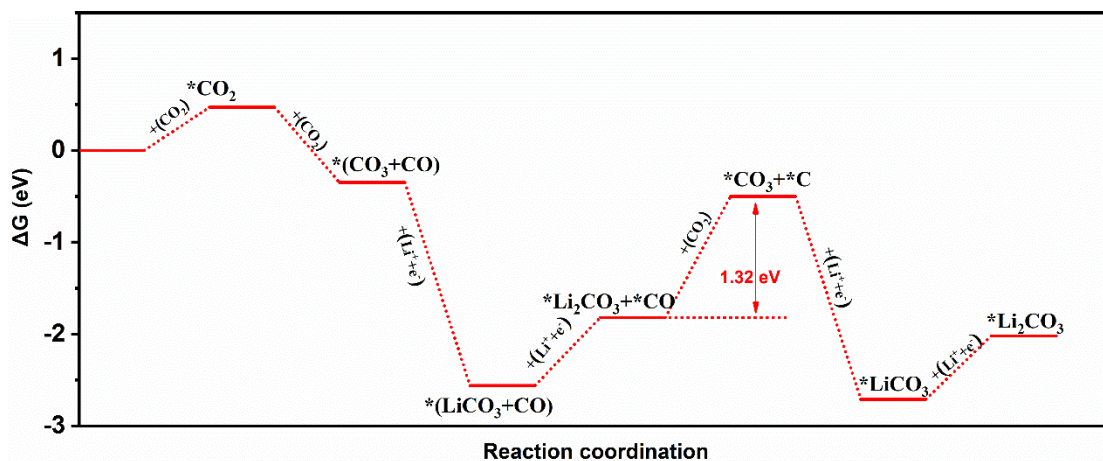

**Figure S17.** Free energies of intermediates during CO<sub>2</sub> reduction to generate Li<sub>2</sub>CO<sub>3</sub> at Cu–CoCoRuRuZn sites on the PRZCNC-HEA surface, corresponding to pathway (5)' in Supplementary Note 3.

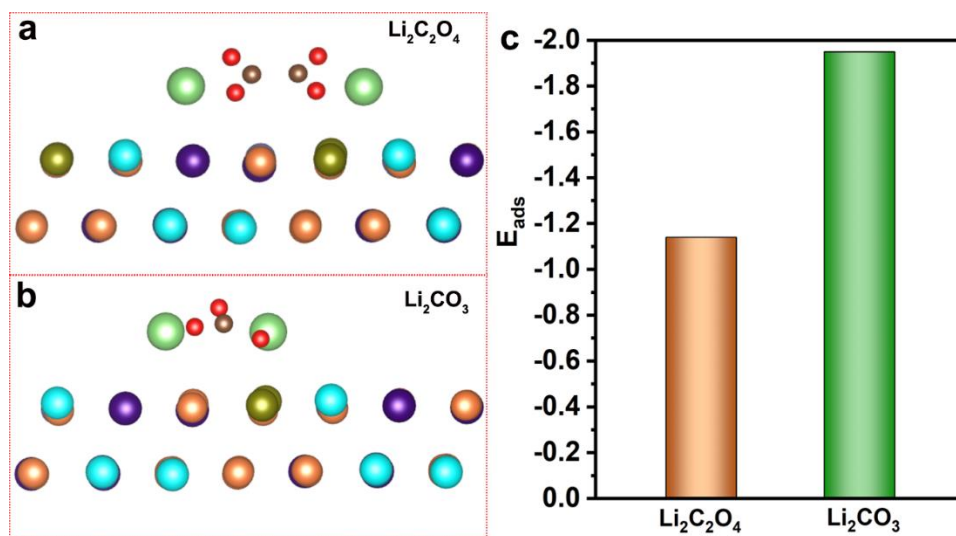

**Figure S18.** Adsorption states of (a) lithium oxalate and (b) lithium carbonate at Pt sites on the PRZCNC-HEA surface, and (c) corresponding adsorption energies.

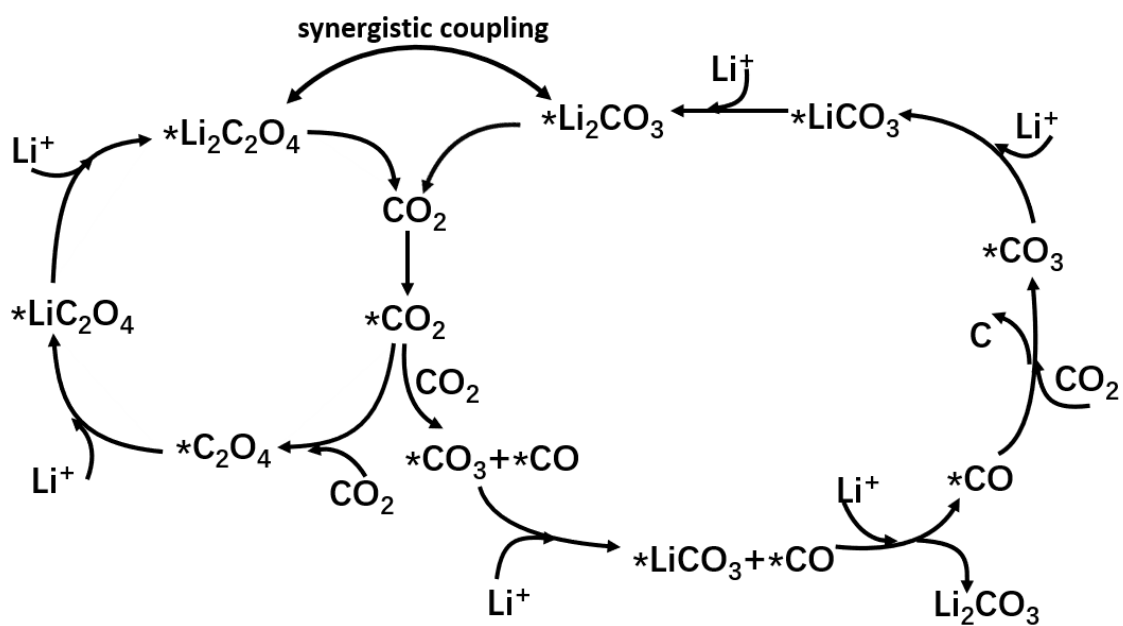

**Figure S19.** Simulated reaction pathway and intermediates for Li-CO<sub>2</sub> batteries during discharge with the PRZCNC-HEA catalyst.

**Table S1.** Performance comparison for PRZCNC-HEA and other reported Li-CO<sub>2</sub> battery cathode catalysts.

| Catalyst                                | Discharge voltage (V) | Overpotential (V) | Discharge capacity (mAh g <sup>-1</sup> ) | Energy efficiency | Reference        |
|-----------------------------------------|-----------------------|-------------------|-------------------------------------------|-------------------|------------------|
| Ru <sub>AC+SA</sub> @NCB                | 3.01                  | 1.65              | 1000                                      | 73.6%             | 1                |
| Co <sub>2</sub> CuS <sub>4</sub>        | 2.79                  | 0.76              | 1900                                      | 78%               | 2                |
| Ni/Ru HNPs                              | 2.87                  | 0.88              | 9700                                      | 76%               | 3                |
| Ru(bpy) <sub>3</sub> Cl <sub>2</sub>    | 2.68                  | 1.18              | 17750                                     | 70%               | 4                |
| TDG-1000                                | 2.8                   | 1.12              | Unknown                                   | 55.82%            | 5                |
| MnO <sub>x</sub> -CeO <sub>2</sub> @PPy | 2.55                  | 1.49              | 13631                                     | 63.1%             | 6                |
| Ru@G                                    | 2.7                   | 0.63              | 9000                                      | 76%               | 7                |
| Fe-ISA/N,S-HG                           | 2.78                  | 1.17              | 23174                                     | 70.4%             | 8                |
| ReS <sub>2</sub>                        | 2.6                   | 0.66              | Unknown                                   | 79.9%             | 9                |
| <b>PRZCNC-HEA</b>                       | <b>3.06</b>           | <b>0.32</b>       | <b>12294</b>                              | <b>91%</b>        | <b>This work</b> |



**Table S2.** Lithium oxalate and lithium carbonate adsorption energies on various surface sites of PRZCNC-HEA.

| Element site    | Adsorption energy<br>(Li <sub>2</sub> C <sub>2</sub> O <sub>4</sub> , eV) | Adsorption energy<br>(Li <sub>2</sub> CO <sub>3</sub> , eV) |
|-----------------|---------------------------------------------------------------------------|-------------------------------------------------------------|
| Cu–CoCoRuRuZn   | –1.41                                                                     | –1.10                                                       |
| Pt–CuCuCoCoCuRu | –1.27                                                                     | –1.53                                                       |
| Co–CuRuRuNiCuCo | –1.51                                                                     | –1.57                                                       |
| Zn–NiPtCuCuRuCu | –1.28                                                                     | –1.31                                                       |
| Ni–CoCuPtZnCuRu | –1.57                                                                     | –1.41                                                       |
| Ru–CuRuCuNiCuPt | –1.14                                                                     | –1.95                                                       |

## Supplementary Note 1

The thermal decomposition of ZIF-8 produced a porous metal–organic framework based on zinc metal and dodecahedral porous carbon nitride (Zn-DPCN), as shown in Figure S1. Using Zn-DPCN as a porous support, an ultrasmall PRZCNC-HEA catalyst was prepared via a spatial confinement strategy.

## Supplementary Note 2

To investigate the stability of  $\text{Li}_2\text{C}_2\text{O}_4$  and  $\text{Li}_2\text{CO}_3$  nucleation on the HEA (111) surface, the adsorption energy was calculated using DFT optimization. The adsorption energy ( $E_{ad}$ ) is defined as:

$$E_{ad}(M) = E_{total} - E_M - E_{slab} \quad (1)$$

where  $E_{total}$  is the total DFT energy of an adsorbate absorbed on the surface,  $E_M$  is the total energy of an isolated molecule, and  $E_{slab}$  is the total energy of the relaxed surface slab model.

The chemical reaction pathways were determined by calculating the standard Gibbs free energies. The zero-point energy, enthalpy, and entropy corrections of the adsorbates were calculated to convert the energy into free energy. The Gibbs free energy ( $G$ ) of an isolated adsorbate was calculated using Equation (2):<sup>10</sup>

$$G = E_{total} + E_{zpe} - TS \quad (2)$$

where  $E_{zpe}$ ,  $T$ , and  $S$  are the zero-point energy, temperature (298 K), and entropy, respectively. The entropy of  $\text{CO}_2$  molecules under standard condition were obtained from the NIST database,<sup>7</sup> and the entropies of other adsorbates were calculated using DFT based on vibrational frequencies. The adsorption sites mentioned in this manuscript refer to the center coordinates of molecules on top of the HEA surface atoms. When modeling each reaction step, the intermediate product was derived by corelaxation of the product from the previous reaction step and the adsorbate from the next step. Each intermediate with the surface slab was modeled independently based on the calculation method proposed by Nørskov et al.<sup>10,11</sup>

### Supplementary Note 3

Li<sub>2</sub>CO<sub>3</sub> nucleation on PRZCNC-HEA can be initiated via the following five pathways:

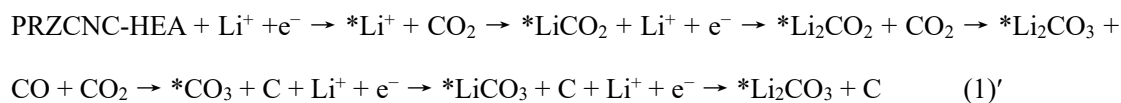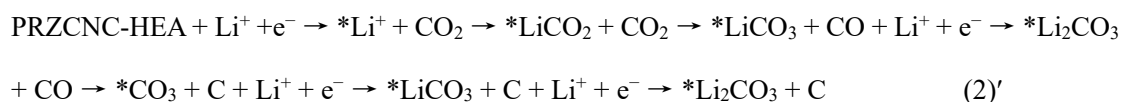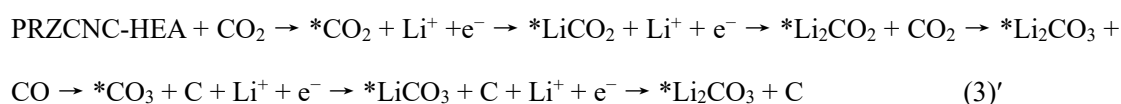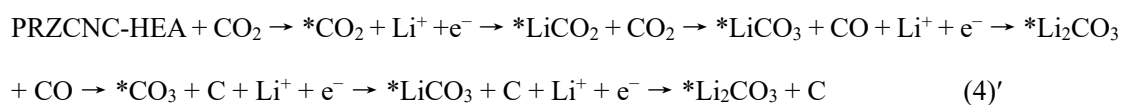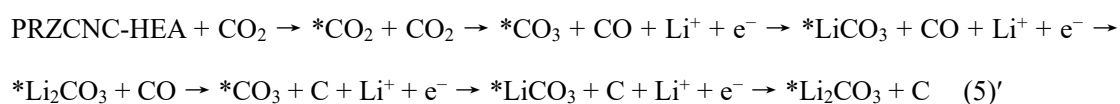

1. J. Lin, J. Ding, H. Wang, X. Yang, X. Zheng, Z. Huang, W. Song, J. Ding, X. Han and W. Hu, *Advanced Materials*, 2022, **34**, 2200559.
2. B. Lu, X. Wu, X. Xiao, B. Chen, W. Zeng, Y. Liu, Z. Lao, X. X. Zeng, G. Zhou and J. Yang, *Advanced Materials*, 2024, **36**, 2308889.
3. L. Fan, H. Shen, D. Ji, Y. Xing, L. Tao, Q. Sun and S. Guo, *Advanced Materials*, 2022, **34**, 2204134.
4. Z. Zhang, W. L. Bai, Z. P. Cai, J. H. Cheng, H. Y. Kuang, B. X. Dong, Y. B. Wang, K. X. Wang and J. S. Chen, *Angewandte Chemie International Edition*, 2021, **133**, 16540-16544.
5. A. Jaradat, M. K. Ncube, I. Papailias, N. Rai, K. Kumar, V. Koverga, R. Y. Nemade, C. Zhang, N. Shan and H. Shahbazi, *Advanced Energy Materials*, 2024, 2303467.
6. Q. Deng, Y. Yang, C. Mao, T. Wang, Z. Fang, W. Yan, K. Yin and Y. Zhang, *Advanced Energy Materials*, 2022, **12**, 2103667.
7. C. Guo, F. Zhang, X. Han, L. Zhang, Q. Hou, L. Gong, J. Wang, Z. Xia, J. Hao and K. Xie, *Advanced Materials*, 2023, **35**, 2302325.
8. C. Hu, L. Gong, Y. Xiao, Y. Yuan, N. M. Bedford, Z. Xia, L. Ma, T. Wu, Y. Lin and J. W. Connell, *Advanced Materials*, 2020, **32**, 1907436.
9. B. Chen, D. Wang, J. Tan, Y. Liu, M. Jiao, B. Liu, N. Zhao, X. Zou, G. Zhou and H. M. Cheng, *Journal of the American Chemical Society*, 2022, **144**, 3106-3116.
